# Supplementary material for: Healthy Diet, Polygenic Risk Score, and Upper Gastrointestinal Cancer Risk: A Prospective Study from UK Biobank
Source: MDPI journal article supplement (doi:10.3390/nu15061344), 2023-03-10
Supplement: s1 [file s1]

## *Supplementary Material*

### **Contents**

**Figure S1A.** Risk of incident UGI cancer according to priori dietary pattern and genetic risk categories in the UKB cohort after excluding participants who report changing their diet in the last 5 years due to illness

**Figure S1B.** Risk of incident UGI cancer according to priori dietary pattern and genetic risk categories in the UKB cohort after excluding participants who report less than 2 years of follow-up

**Figure S1C.** Risk of incident UGI cancer according to priori dietary pattern and genetic risk categories in the UKB cohort after excluding non-white participants

**Table S1.** Serving size and coding of intake for each touchscreen food items/food groups

**Table S2.** Healthy diet score factors definition

**Table S3.** Single nucleotide polymorphisms utilized to build the polygenic risk scores for UGI cancer

**Table S4.** Definition of covariates

**Table S5.** Associations between healthy diet score and the risk of UGI cancer after excluding participants who report changing their diet due to in the last 5 years due to illness or after excluding participants who report less than 2 years of follow-up or after excluding non-white participants

**Table S6.** UGI cancer risk associated with priori dietary pattern by genetic risk level after excluding participants who report changing their diet in the last 5 years due to illness or after excluding participants who report less than 2 years of follow-up or after excluding non-white participants

## 1.1 Figures

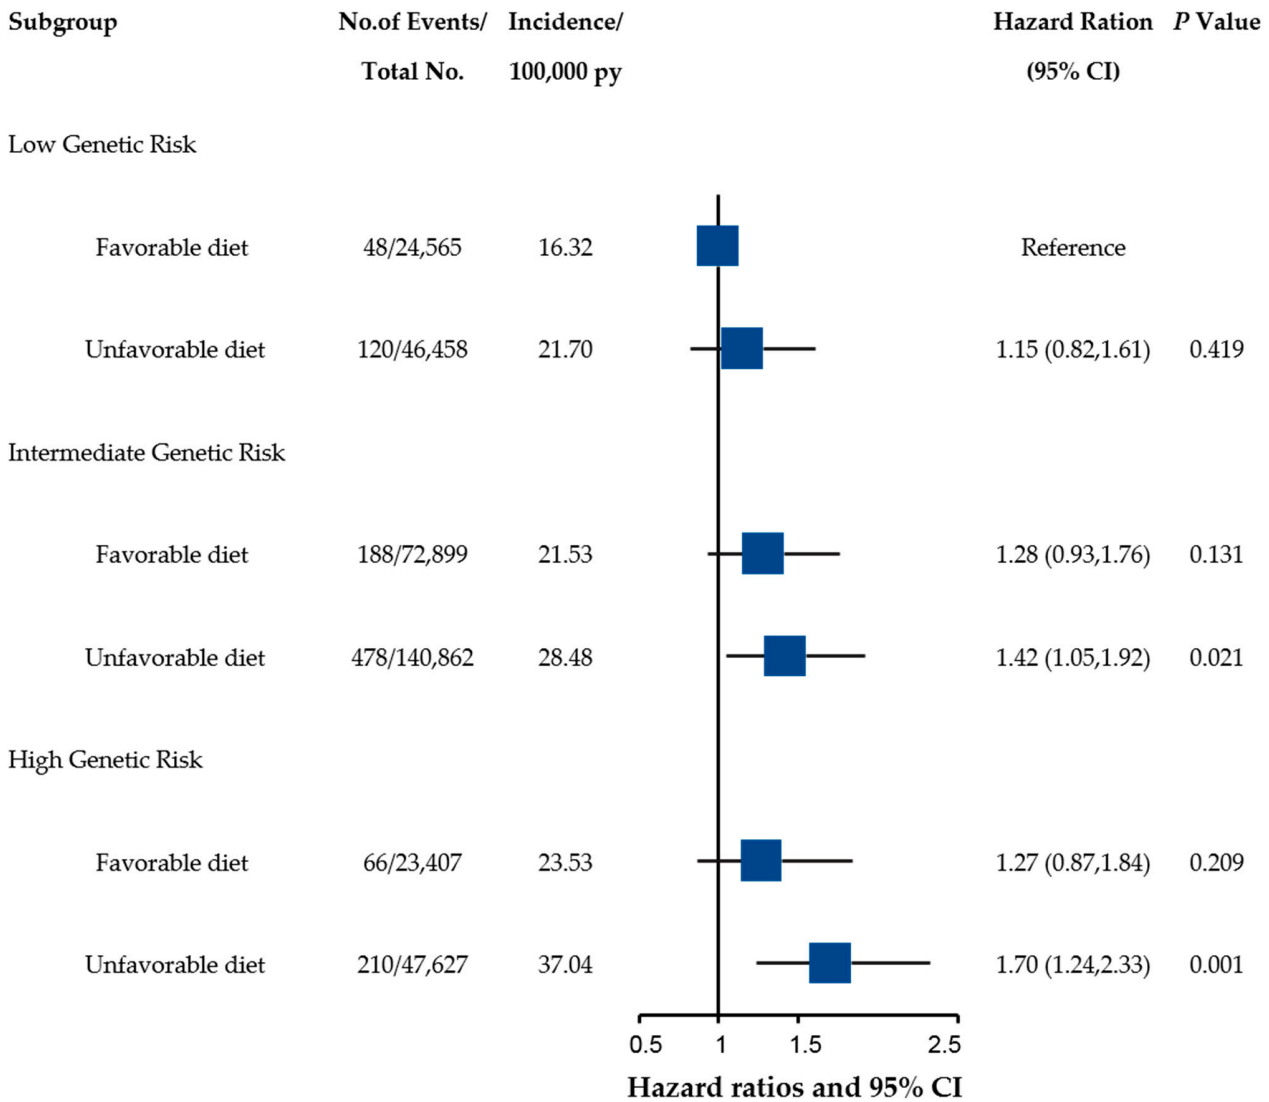

**Figure S1A. Risk of incident UGI cancer according to healthy diet and genetic risk categories in the UKB cohort after excluding participants who report changing their diet in the last 5 years due to illness.** The HRs were estimated using Cox proportional hazard models with adjustment for age at recruitment, sex, geographical region (10 regions), ethnicity, Townsend deprivation index, education, BMI, glycosylated hemoglobin (HbA1c) smoking status, alcohol intake frequency, physical activity, multimorbidity, family history of cancer and the first 10 principal components of ancestry.

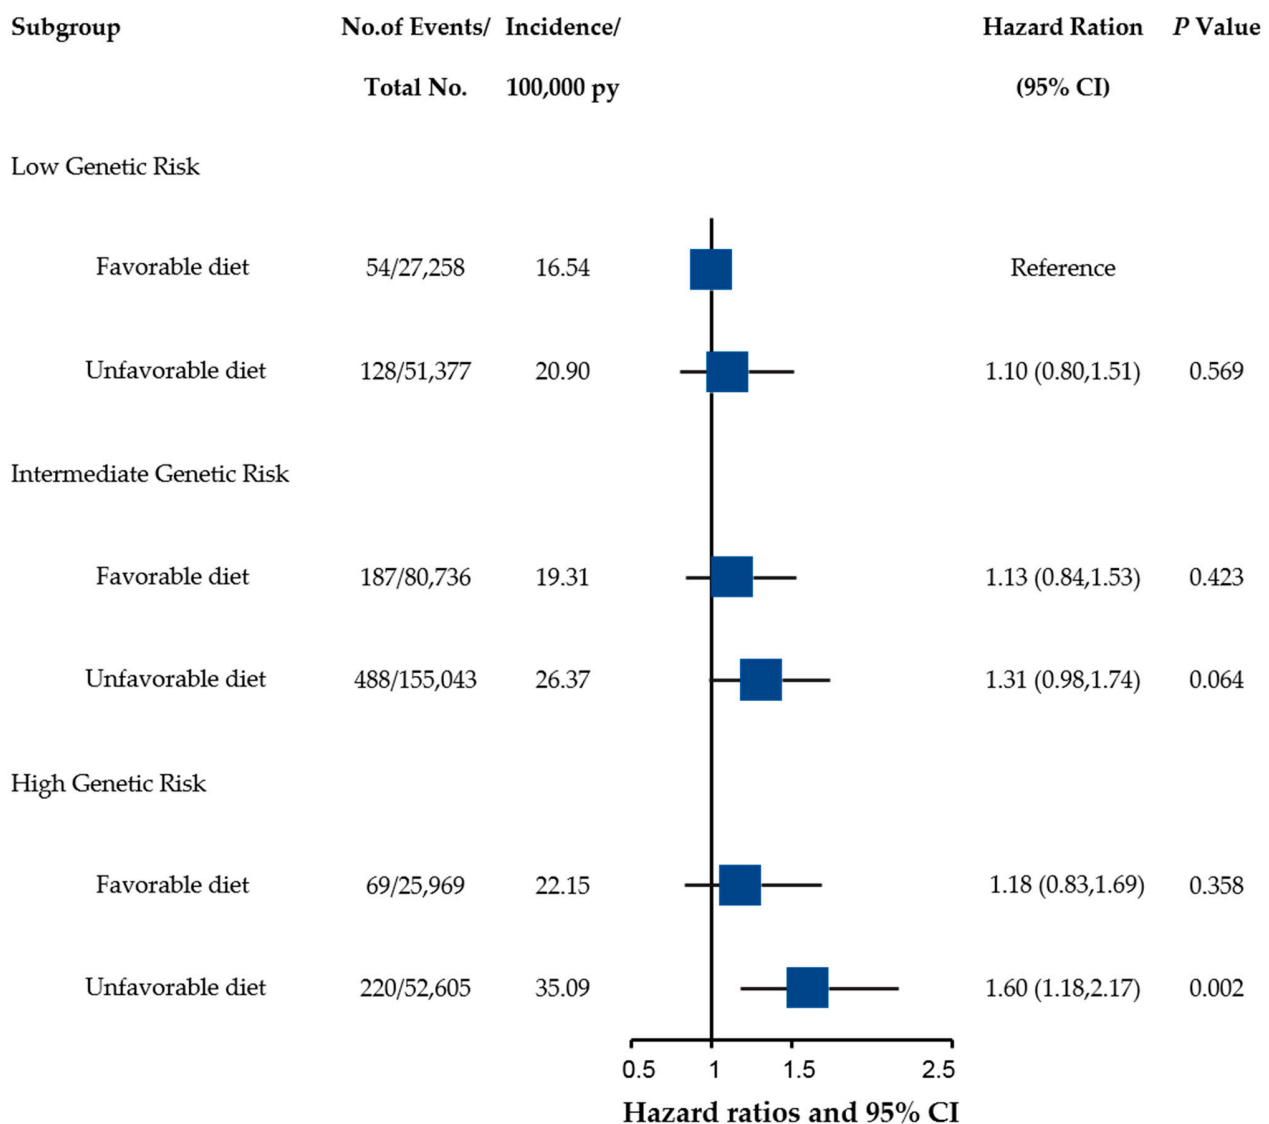

**Figure S1B. Risk of incident UGI cancer according to healthy diet and genetic risk categories in the UKB cohort after excluding participants who report less than 2 years of follow-up.** The HRs were estimated using Cox proportional hazard models with adjustment for age at recruitment, sex, geographical region (10 regions), ethnicity, Townsend deprivation index, education, BMI, glycosylated hemoglobin (HbA1c) smoking status, alcohol intake frequency, physical activity, multimorbidity, family history of cancer and the first 10 principal components of ancestry.

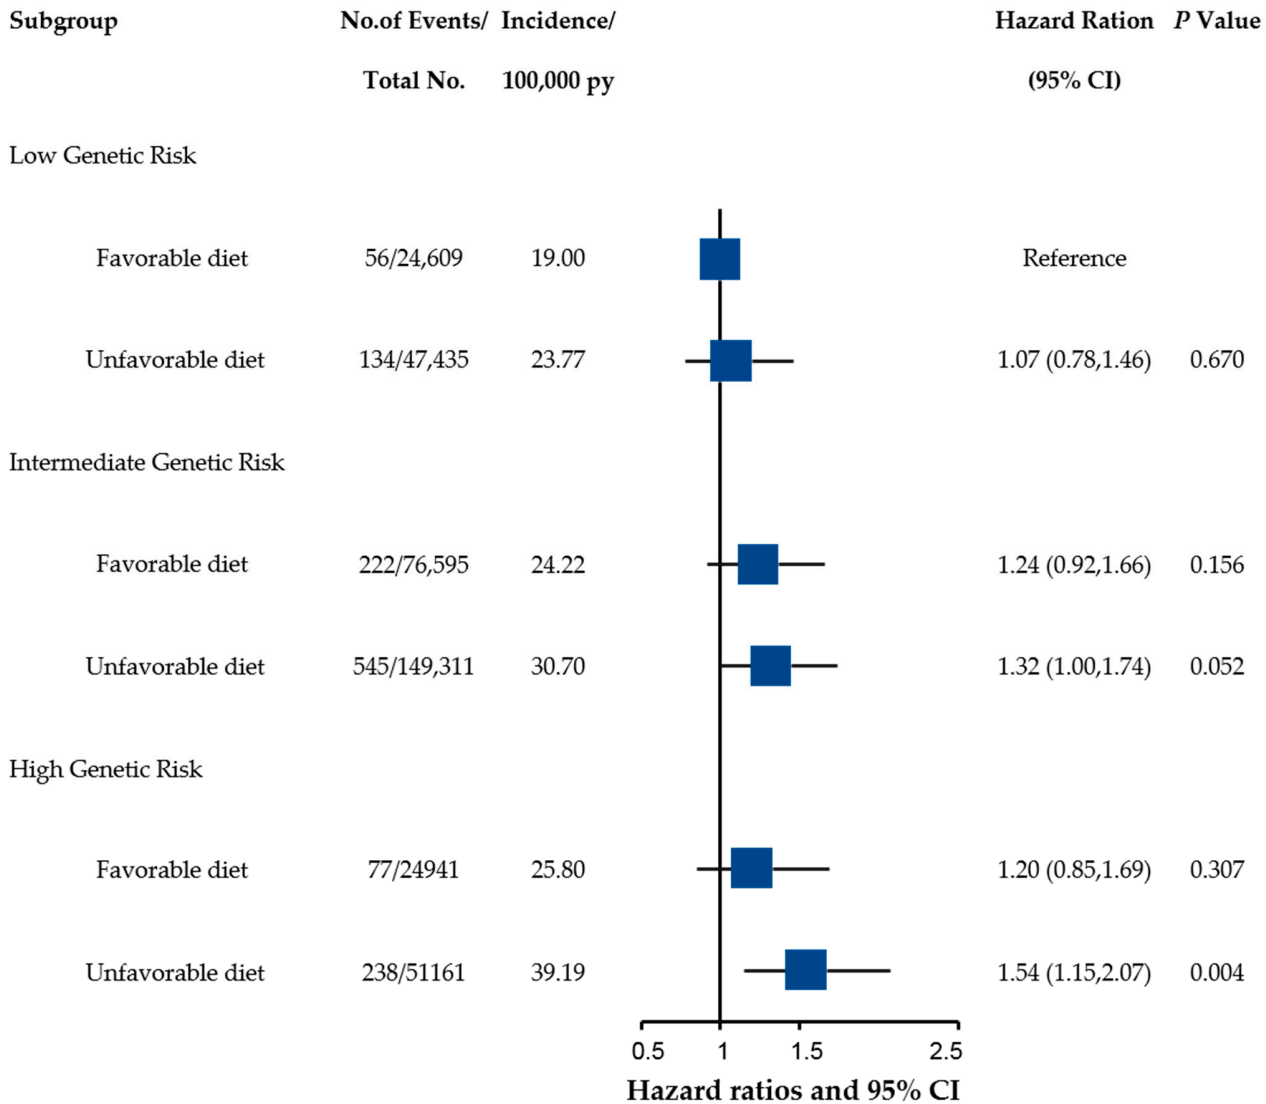

**Figure S1C. Risk of incident UGI cancer according to healthy diet and genetic risk categories in the UKB cohort after excluding non-white participants.** The HRs were estimated using Cox proportional hazard models with adjustment for age at recruitment, sex, geographical region (10 regions), ethnicity, Townsend deprivation index, education, BMI, glycosylated hemoglobin (HbA1c) smoking status, alcohol intake frequency, physical activity, multimorbidity, family history of cancer and the first 10 principal components of ancestry.

## 1.2 Tables

**Table S1.** Serving size and coding of intake for each touchscreen food items/food groups

| Food groups    | Food items     | Field IDs                           | Amount per serving | Coding                                                                                                                                    |
|----------------|----------------|-------------------------------------|--------------------|-------------------------------------------------------------------------------------------------------------------------------------------|
| Red meat       | Beef           | 1369 (beef/week )                   | Once/week          | 'Never' = 0, 'Less than once a week' = 0.5, 'Once a week' = 1, '2-4 times a week' = 3, '5-6 times a week' = 5.5, 'Once or more daily' = 7 |
|                | Lamb/mutton    | 1379 (lamb or mutton/week)          | Once/week          | 'Never' = 0, 'Less than once a week' = 0.5, 'Once a week' = 1, '2-4 times a week' = 3, '5-6 times a week' = 5.5, 'Once or more daily' = 7 |
|                | Pork           | 1389 (pork/week)                    | Once/week          | 'Never' = 0, 'Less than once a week' = 0.5, 'Once a week' = 1, '2-4 times a week' = 3, '5-6 times a week' = 5.5, 'Once or more daily' = 7 |
| Processed meat | Processed meat | 1349 (processed meat/week or daily) | Once/week          | 'Never' = 0, 'Less than once a week' = 0.5, 'Once a week' = 1, '2-4 times a week' = 3, '5-6 times a week' = 5.5, 'Once or more daily' = 7 |
| Total fish     | Oily fish      | 1329 (oily fish/week)               | Once/week          | 'Never' = 0, 'Less than once a week' = 0.5, 'Once a week' = 1, '2-4 times a week' = 3, '5-6 times a week' = 5.5, 'Once or more daily' = 7 |
|                | Non-oily fish  | 1339 (non-oily fish/week)           | Once/week          | 'Never' = 0, 'Less than once a week' = 0.5, 'Once a week' = 1, '2-4 times a week' = 3, '5-6 times a week' = 5.5, 'Once or more daily' = 7 |
| Total fruit    | Fresh fruit    | 1309 (pieces fresh fruit/day)       | 1 piece            | 'Less than one' = 0.5                                                                                                                     |
|                | Dried fruit    | 1319 (pieces dried fruit/day)       | 2 pieces           | 'Less than one' = 0.5                                                                                                                     |

# Supplementary Material

|                     |                                |                                                   |                         |                       |
|---------------------|--------------------------------|---------------------------------------------------|-------------------------|-----------------------|
| Total<br>vegetables | Cooked vegetables              | 1289 (tablespoons<br>cooked<br>vegetables/day)    | 2 heaped<br>tablespoons | 'Less than one' = 0.5 |
|                     | Salad/raw<br>vegetables        | 1299 (tablespoons<br>salad/raw<br>vegetables/day) | 2 heaped<br>tablespoons | 'Less than one' = 0.5 |
| Whole<br>grains     | Wholemeal/whole<br>grain bread | 1438-1 slice/week                                 | 1 slice/day             | 'Less than one' = 0.5 |
|                     | Bran/oat/muesli<br>cereal      | 1458-1 bowl/week                                  | 1 bowl/day              | 'Less than one' = 0.5 |
| Refined<br>grains   | White, brown,<br>other bread   | 1438-1 slice/week                                 | 1 slice/day             | 'Less than one' = 0.5 |
|                     | Biscuit, other<br>cereals      | 1458-1 bowl/week                                  | 1 bowl/day              | 'Less than one' = 0.5 |

**Table S2.** Healthy diet score definition

| Healthy diet score factors | Intake goal         | Field IDs                                                                                             | Amount per serving                                |
|----------------------------|---------------------|-------------------------------------------------------------------------------------------------------|---------------------------------------------------|
| Total fruits               | ≥ 4 servings/day    | 1309 (pieces fresh fruit/day)<br>1319 (pieces dried fruit/day)                                        | 1309 – 1 piece<br>1319 – 2 pieces                 |
| Total vegetables           | ≥ 4 servings/day    | 1289 (tablespoons cooked vegetables/day)<br>1299 (salad/raw vegetables/day)                           | 2 heaped tablespoons                              |
| Total fish                 | ≥ 2 servings/week   | 1329 (oily fish/week)<br>1339 (non-oily fish/week)                                                    | Once/week                                         |
| Processed meats            | ≤ 1 servings/week   | 1349 (processed meat/week or daily)                                                                   | Once/week                                         |
| Red meat                   | ≤ 1.5 servings/week | 1369 (beef/week)<br>1379 (lamb or mutton/week)<br>1389 (pork/week)                                    | Once/week                                         |
| Whole grains               | ≥ 3 servings/day    | 1438, 1448 (wholemeal/wholegrain bread slices/week)<br>1458, 1468 (bran/oat/muesli cereal bowls/week) | 1438/1448 – 1 slice/day<br>1458/1468 – 1 bowl/day |
| Refined grains             | ≤ 1.5 servings/day  | 1438, 1448 (white, brown, other bread slices/week)<br>1458, 1468 (biscuit, other cereals/week)        | 1438/1448 – 1 slice/day<br>1458/1468 – 1 bowl/day |

**Table S3.** Single nucleotide polymorphisms utilized to build the polygenic risk scores for UGI cancer

| Index | ICD10-code | Cancer site | ASR <sup>a</sup> | No. of<br>SNPs<br>included | SNP rsID <sup>b</sup> | Chr. | Position<br>(GRCh37) | Risk<br>Allele | Other<br>Allele | Weight      | Study (PMID) | Comment                   |
|-------|------------|-------------|------------------|----------------------------|-----------------------|------|----------------------|----------------|-----------------|-------------|--------------|---------------------------|
| 1     | C15        | Oesophagus  | 14.7             | 13                         | rs3072                | 2    | 20878406             | C              | T               | 0.131028262 | 30243622     | -                         |
| 2     | C15        | Oesophagus  | 14.7             | 13                         | rs7255                | 2    | 20878820             | T              | C               | 0.157003749 | 30243622     | Removed after LD clumping |
| 3     | C15        | Oesophagus  | 14.7             | 13                         | rs13397172            | 2    | 200045039            | C              | T               | 0.122217633 | 30243622     | -                         |
| 4     | C15        | Oesophagus  | 14.7             | 13                         | rs2687202             | 3    | 70929983             | T              | C               | 0.122217633 | 30243622     | -                         |
| 5     | C15        | Oesophagus  | 14.7             | 13                         | rs9823696             | 3    | 183783353            | A              | G               | 0.157003749 | 30243622     | -                         |
| 6     | C15        | Oesophagus  | 14.7             | 13                         | rs62423175            | 6    | 62195368             | A              | G               | 0.207014169 | 30243622     | -                         |
| 7     | C15        | Oesophagus  | 14.7             | 13                         | rs2188554             | 7    | 117040117            | A              | G               | 0.207014169 | 30243622     | Removed after LD clumping |
| 8     | C15        | Oesophagus  | 14.7             | 13                         | rs17451754            | 7    | 117256712            | G              | A               | 0.223143551 | 30243622     | -                         |
| 9     | C15        | Oesophagus  | 14.7             | 13                         | rs17749155            | 8    | 10068073             | A              | G               | 0.131028262 | 30243622     | -                         |
| 10    | C15        | Oesophagus  | 14.7             | 13                         | rs10108511            | 8    | 11435516             | T              | C               | 0.113328685 | 30243622     | -                         |
| 11    | C15        | Oesophagus  | 14.7             | 13                         | rs11789015            | 9    | 96716028             | A              | G               | 0.182321557 | 30243622     | -                         |
| 12    | C15        | Oesophagus  | 14.7             | 13                         | rs7852462             | 9    | 100310501            | C              | T               | 0.076961041 | 30243622     | -                         |
| 13    | C15        | Oesophagus  | 14.7             | 13                         | rs1247942             | 12   | 114673723            | G              | C               | 0.104360015 | 30243622     | Unspecified allele        |
| 14    | C15        | Oesophagus  | 14.7             | 13                         | rs66725070            | 15   | 58267416             | GACAT          | -               | 0.139761942 | 30243622     | Unavailable in UK Biobank |
| 15    | C15        | Oesophagus  | 14.7             | 13                         | rs2464469             | 15   | 58362025             | G              | A               | 0.104360015 | 30243622     | -                         |
| 16    | C15        | Oesophagus  | 14.7             | 13                         | rs1979654             | 16   | 86396835             | G              | C               | 0.104360015 | 30243622     | Unspecified allele        |
| 17    | C15        | Oesophagus  | 14.7             | 13                         | rs10419226            | 19   | 18803172             | T              | G               | 0.165514438 | 30243622     | -                         |
| 18    | C15        | Oesophagus  | 14.7             | 13                         | rs10423674            | 19   | 18817903             | C              | A               | 0.173953307 | 30243622     | -                         |
| 19    | C16        | Stomach     | 9.9              | 3                          | rs140081212           | 1    | 153451599            | G              | A               | 0.235722334 | 26098866     | Unavailable in UK Biobank |
| 20    | C16        | Stomach     | 9.9              | 3                          | rs760077              | 1    | 153445406            | T              | A               | 0.235722334 | 26098866     | -                         |
| 21    | C16        | Stomach     | 9.9              | 3                          | rs6676150             | 1    | 153390461            | G              | C               | 0.235722334 | 26098866     | Removed after LD clumping |
| 22    | C16        | Stomach     | 9.9              | 3                          | rs2920295             | 8    | 143764937            | G              | A               | 0.19062036  | 26098866     | -                         |
| 23    | C16        | Stomach     | 9.9              | 3                          | rs10036575            | 5    | 40685795             | T              | C               | 0.210721031 | 26098866     | -                         |

<sup>a</sup>The age-standardized incidence rates (ASR, per 100,000 person-years) of each cancer in UK was assessed from the Office for National Statistics (<https://www.ons.gov.uk>).

<sup>b</sup>Single Nucleotide Polymorphisms (SNPs) were selected from previously published GWASs with the largest sample size for each cancer.



**Table S4.** Definition of covariates

| <b>Covariates</b>                 | <b>Definition</b>                                                                                                                                                                                                                                                                                           | <b>UK Biobank<br/>Field code</b> |
|-----------------------------------|-------------------------------------------------------------------------------------------------------------------------------------------------------------------------------------------------------------------------------------------------------------------------------------------------------------|----------------------------------|
| Age at recruitment                | UK Biobank Touchscreen questionnaire at baseline;<br>age at recruitment                                                                                                                                                                                                                                     | 21003                            |
| Sex                               | UK Biobank Touchscreen questionnaire at baseline;<br>Male, female.                                                                                                                                                                                                                                          | 31                               |
| Townsend Deprivation Index        | UK Biobank Touchscreen questionnaire at baseline;<br>A score derived from national census data about<br>car ownership, household overcrowding, owner<br>occupation, and unemployment aggregated for<br>postcodes of residence                                                                               | 189                              |
| Geographical region               | UK Biobank Touchscreen questionnaire at baseline;<br>East Midlands, London, North Eastern England,<br>North West England, Scotland, South East England,<br>South west England, Wales, West Midlands<br>England, Yorkshire and the Humber                                                                    | 54                               |
| Ethnicity                         | UK Biobank Touchscreen questionnaire at baseline;<br>white, nonwhite and unknown                                                                                                                                                                                                                            | 21000                            |
| Education                         | UK Biobank Touchscreen questionnaire at baseline;<br>College or University degree, No degree (Other<br>professional qualifications eg nursing, A levels/AS<br>levels or equivalent, O levels/GCSEs or equivalent,<br>CSEs or equivalent, NVQ or HND or HNC or<br>equivalent, None of the above) and unknown | 6138                             |
| BMI                               | UK Biobank Touchscreen questionnaire at baseline;<br><25 kg/m <sup>2</sup> , 25–29.9 kg/m <sup>2</sup> , ≥30kg/m <sup>2</sup>                                                                                                                                                                               | 21001                            |
| HbA1c                             | UK Biobank Touchscreen questionnaire at baseline;<br>quintiles, lowest fifth≤32.3 mmol/mol, 2 fifth(32,3-<br>34.6 mmol/mol), 3 fifth(34.6-35.9 mmol/mol), 4<br>fifth(35.9-38.4 mmol/mol), highest fifth >38.4<br>mmol/mol)                                                                                  | 30750                            |
| Smoking status                    | UK Biobank Touchscreen questionnaire at baseline;<br>never, former, current, unknown                                                                                                                                                                                                                        | 20116                            |
| Alcohol consumption               | UK Biobank Touchscreen questionnaire at baseline;<br>never/rare, twice or less per week, at least three<br>times per week, unknown                                                                                                                                                                          | 20117                            |
| Physical activity                 | UK Biobank Touchscreen questionnaire at baseline;<br>summed MET minutes per week for walking, MET<br>minutes per week for moderate activity and MET<br>minutes per week for vigorous activity. (low:<600<br>MET minutes/week, intermediate: 600-3000 MET<br>minutes/week, high: >3000 MET minutes/week)     | 22037,<br>22038,<br>22039        |
| Number of non-cancer<br>illnesses | UK Biobank Touchscreen questionnaire at baseline;<br>None, ≥1, unknown                                                                                                                                                                                                                                      | 135                              |
| Family history of cancer          | UK Biobank Touchscreen questionnaire at baseline;<br>No: None, Yes: at least one family member had ever<br>been diagnosed with a cancer                                                                                                                                                                     | 20107;<br>20110;<br>20111        |

**Table S5.** Associations between healthy diet and the risk of UGI cancer after excluding participants who report changing their diet in the last 5 years due to illness or after excluding participants who report less than 2 years of follow-up or after excluding non-white participants.<sup>1</sup>

| Healthy diet                    | after excluding participants reported<br>changing their diet due to illness |                  |         | after excluding participants who report<br>less than 2 years of follow-up |                  |         | after excluding non-white<br>participants |                  |         |
|---------------------------------|-----------------------------------------------------------------------------|------------------|---------|---------------------------------------------------------------------------|------------------|---------|-------------------------------------------|------------------|---------|
|                                 | Total No.<br>(cases)*                                                       | HR (95%CI)       | P value | Total No.<br>(cases)*                                                     | HR (95%CI)       | P value | Total No.<br>(cases)*                     | HR (95%CI)       | P value |
| Healthy diet score <sup>2</sup> |                                                                             |                  |         |                                                                           |                  |         |                                           |                  |         |
| Low diet quality (0-1)          | 57833 (255)                                                                 | 1.00 (ref)       |         | 63829 (278)                                                               | 1.00 (ref)       |         | 62064 (301)                               | 1.00 (ref)       |         |
| Intermediate diet quality (2-4) | 268354 (811)                                                                | 0.90 (0.78,1.04) | 0.152   | 296284 (818)                                                              | 0.82 (0.71,0.94) | 0.005   | 281515 (909)                              | 0.87 (0.76,0.99) | 0.035   |
| High diet quality (5-7)         | 48370 (113)                                                                 | 0.73 (0.58,0.91) | 0.006   | 53841 (119)                                                               | 0.69 (0.55,0.85) | 0.001   | 50500 (136)                               | 0.76 (0.62,0.93) | 0.009   |
| Per 2 score increase            | 374557 (1179)                                                               | 0.88 (0.81,0.95) | 0.002   | 413954 (1215)                                                             | 0.86 (0.79,0.94) | <0.001  | 394079 (1346)                             | 0.90 (0.83,0.97) | 0.007   |
| P for trend                     |                                                                             |                  | 0.007   |                                                                           |                  | <0.001  |                                           |                  | 0.006   |

Definition of abbreviations: HR, hazard ratio; 95%CI, 95% confidence interval; ref, reference.

<sup>1</sup> HR adjusted for age at recruitment, sex, geographical region (10 regions), Townsend deprivation index, ethnicity, education, BMI, Hb1Ac, smoking status, alcohol intake frequency, physical activity, multimorbidity and family history of cancer.

<sup>2</sup> Healthy diet score: using available data from UK Biobank Food Frequency Questionnaire at baseline; Health diet score ranged from 0 to 7. Fruits:  $\geq 4$  servings/day; Vegetables:  $\geq 4$  servings/day; Fish:  $\geq 2$  servings/week; Processed meats:  $\leq 1$  serving/week; Unprocessed red meats:  $\leq 1.5$  servings/week; Whole grains:  $\geq 3$  servings/day; Refined grains:  $\leq 1.5$  servings/day.

**Table S6.** UGI cancer risk associated with healthy diet by genetic risk level after excluding participants who report changing their diet in the last 5 years due to illness or after excluding participants who report less than 2 years of follow-up or after excluding non-white participants<sup>1</sup>

| Healthy diet                                                                                          | Low genetic risk |                   | Intermediate genetic risk |                   | High genetic risk |                   |
|-------------------------------------------------------------------------------------------------------|------------------|-------------------|---------------------------|-------------------|-------------------|-------------------|
|                                                                                                       | Unfavorable      | Favorable         | Unfavorable               | Favorable         | Unfavorable       | Favorable         |
| <b>after excluding participants who report changing their diet in the last 5 years due to illness</b> |                  |                   |                           |                   |                   |                   |
| No. of cases/Person-years                                                                             | 120/552983       | 48/294044         | 478/1678485               | 188/873048        | 210/567001        | 66/280449         |
| HR (95% CI)                                                                                           | Ref.             | 0.81 (0.58-1.15)  | Ref.                      | 0.91 (0.76-1.08)  | Ref.              | 0.76 (0.57-1.01)  |
| P value                                                                                               |                  | 0.240             |                           | 0.272             |                   | 0.058             |
| Absolute risk (%) -5years (95%CI)                                                                     | 0.10 (0.07-0.12) | 0.07 (0.05-0.10)  | 0.13 (0.11-0.15)          | 0.10 (0.08-0.11)  | 0.15 (0.12-0.18)  | 0.09 (0.07-0.12)  |
| Absolute risk reduction (%) -5years (95% CI)                                                          | Ref.             | 0.02 (0.00, 0.05) | Ref.                      | 0.03 (0.01, 0.05) | Ref.              | 0.05 (0.02, 0.08) |
| <b>after excluding participants who report less than 2 years of follow-up</b>                         |                  |                   |                           |                   |                   |                   |
| No. of cases/Person-years                                                                             | 128/ 612424      | 54/326519         | 488/ 1850682              | 187/968322        | 220/626948        | 69/311504         |
| HR (95% CI)                                                                                           | Ref.             | 0.86 (0.62-1.19)  | Ref.                      | 0.87 (0.73-1.03)  | Ref.              | 0.76 (0.58-1.00)  |
| P value                                                                                               |                  | 0.364             |                           | 0.104             |                   | 0.049             |
| Absolute risk (%) -5years (95%CI)                                                                     | 0.07 (0.05-0.09) | 0.06 (0.04-0.08)  | 0.09 (0.07-0.10)          | 0.06 (0.05-0.07)  | 0.11 (0.08-0.14)  | 0.07 (0.05-0.09)  |
| Absolute risk reduction (%) -5years (95% CI)                                                          | Ref.             | 0.01 (-0.01-0.04) | Ref.                      | 0.02 (0.01-0.03)  | Ref.              | 0.04 (0.02-0.06)  |
| <b>after excluding non-white participants</b>                                                         |                  |                   |                           |                   |                   |                   |
| No. of cases/Person-years                                                                             | 134/563698       | 56/294667         | 545/1775543               | 222/916570        | 238/607289        | 77/298501         |
| HR (95% CI)                                                                                           | Ref.             | 0.90 (0.65-1.23)  | Ref.                      | 0.94 (0.80-1.10)  | Ref.              | 0.79 (0.61-1.03)  |
| P value                                                                                               |                  | 0.500             |                           | 0.441             |                   | 0.084             |
| Absolute risk (%) -5years (95%CI)                                                                     | 0.10 (0.08-0.13) | 0.08 (0.06-0.11)  | 0.14 (0.12-0.16)          | 0.11 (0.09-0.13)  | 0.16 (0.12-0.19)  | 0.10 (0.08-0.13)  |
| Absolute risk reduction (%) -5years (95% CI)                                                          | Ref.             | 0.02 (-0.01-0.05) | Ref.                      | 0.03 (0.01-0.05)  | Ref.              | 0.05 (0.02-0.09)  |

<sup>1</sup> HR adjusted for age at recruitment, sex, geographical region (10 regions), Townsend deprivation index, ethnicity, education, BMI, glycosylated hemoglobin (HbA1c), smoking status, alcohol intake frequency, physical activity, multimorbidity and family history of cancer.
